# Supplementary material
Source: publisher figshare collection journal article supplement (https://karger.figshare.com/articles/dataset/_/5124376)
Supplement: Supplementary file 1 [file 1]

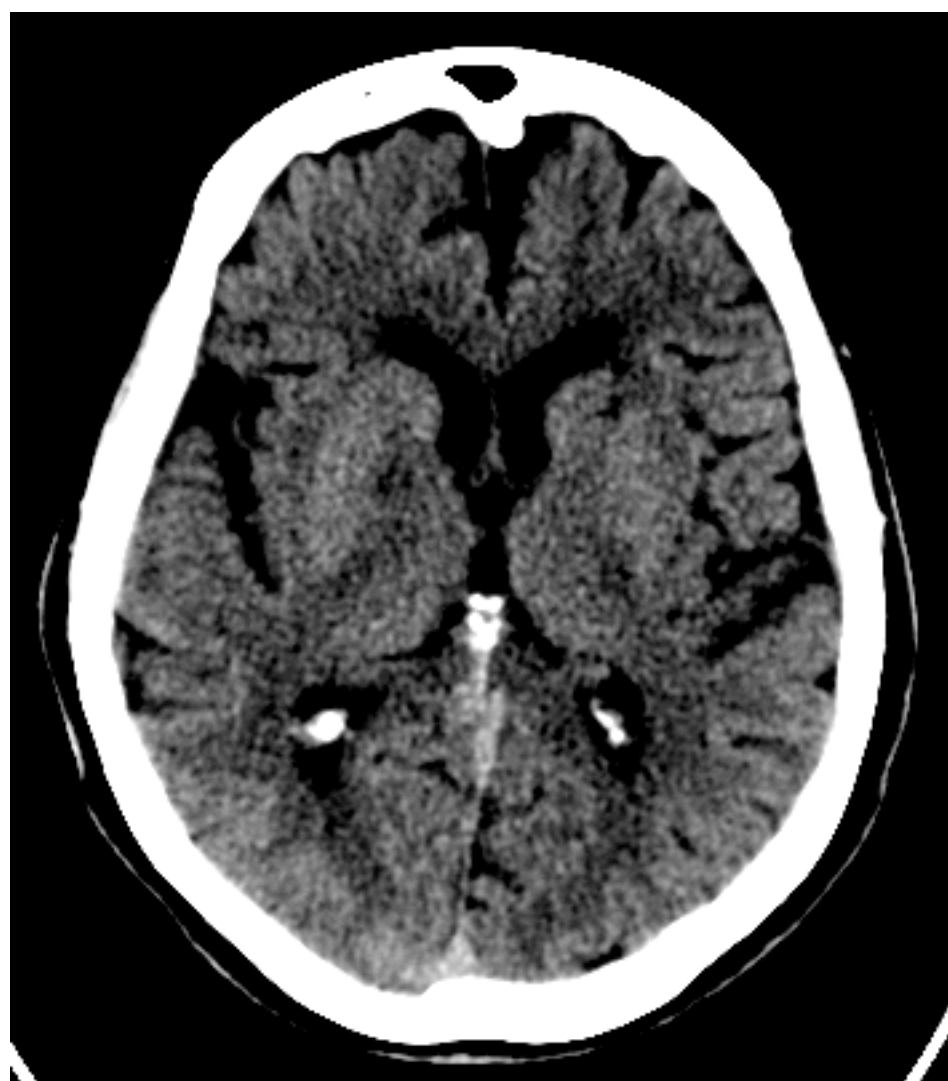

Supplementary figure 1. CT of the head showing basal ganglia hypointensities due to iron deposition.

**Video Legend**

Video 1. Orofacial dyskinesia, mild bradykinesia without decrementing amplitude, and absence of tremor are demonstrated.
