# Supplementary material
Source: publisher figshare collection journal article supplement (https://karger.figshare.com/articles/dataset/_/5124376)
Supplement: Supplementary file 3 [file 1]

Archive with 5 entries (5 files):
- 000345871_sm_.MOV
- 000345871_sm_Figure.pdf
- 000345871_sm_Figure.tif
- 000345871_sm_Legends.pdf
- 000345871_sm_video.MOV
