# Supplementary material
Source: publisher figshare collection journal article supplement (https://karger.figshare.com/articles/dataset/_/5124376)

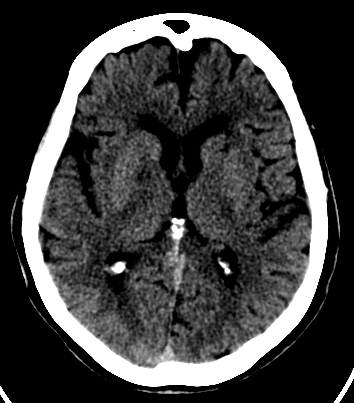

Supplement: Supplementary file 3 [file 1 › 000345871_sm_Figure.tif]
